# Supplementary material for: Persulfate activation by nano zero-valent iron for the degradation of metoprolol in water: influencing factors, degradation pathways and toxicity analysis
Source: Royal Society of Chemistry journal article supplement (doi:10.1039/d0ra01273d), 2020-01-01
Supplement: d0ra01273d1.pdf [file d0ra01273d1.pdf]

## Supplementary Information

for

### **Persulfate activation by nano zero-valent iron for the degradation of metoprolol in water: influencing factors, degradation pathways and toxicity analysis**

Yu-qiong Gao<sup>\*a</sup>, Jia Zhang<sup>a</sup>, Jin-qiang Zhou<sup>a</sup>, Cong Li<sup>a</sup>, Nai-yun Gao<sup>b</sup>, and Da-qiang

Yin<sup>b</sup>

<sup>a</sup>School of Environment and Architecture, University of Shanghai for Science and  
Technology, Shanghai 200093, China

<sup>b</sup>State Key Laboratory of Pollution Control and Resource Reuse, College of  
Environmental Science and Engineering, Tongji University, Shanghai 200092, China

\*Corresponding authors Email address: [gaoyq@usst.edu.cn](mailto:gaoyq@usst.edu.cn) (Yu-qiong Gao)

Tel.: +86 21 55275979

Table S1. The major qualities of WWTP effluent.

| Sample        | pH   | TOC (mg/L) | Cl <sup>-</sup> (mg/L) | SO <sub>4</sub> <sup>2-</sup> (mg/L) | NO <sub>3</sub> <sup>-</sup> (mg/L) |
|---------------|------|------------|------------------------|--------------------------------------|-------------------------------------|
| WWTP effluent | 7.02 | 8.9        | 57                     | 32                                   | 7.1                                 |

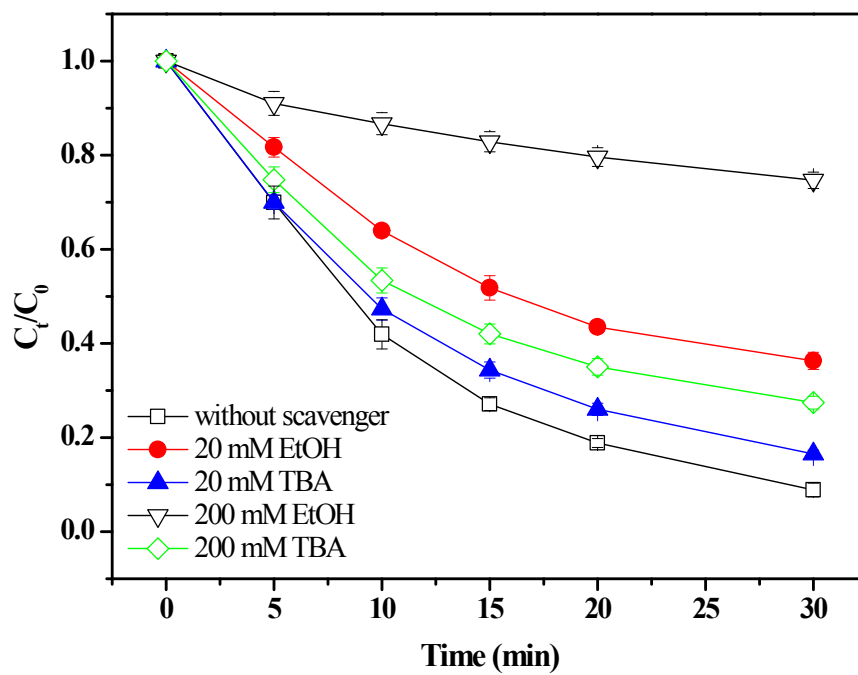

Fig. S1. Effect of EtOH and TBA on MTP degradation in the nZVI/PS system.

Conditions:  $[MTP]_0 = 0.05$  mM,  $[PS]_0 = 2$  mM,  $[nZVI]_0 = 0.33$  g/L, no pH adjustment.

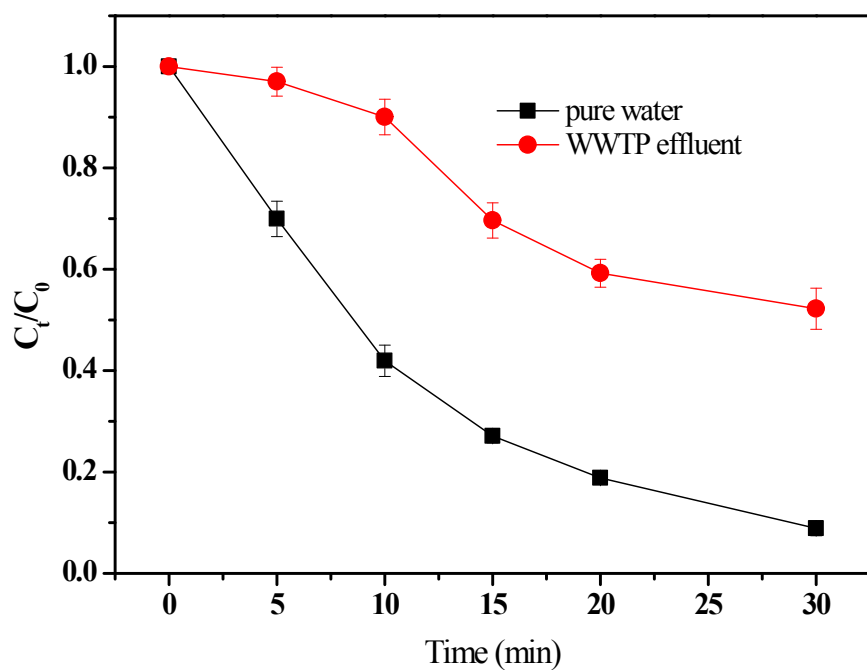

Fig. S2. Degradation of MTP by the nZVI/PS in WWTP effluent.

Conditions:  $[MTP]_0 = 0.05$  mM,  $[PS]_0 = 2$  mM,  $[nZVI]_0 = 0.33$  g/L, no pH adjustment.

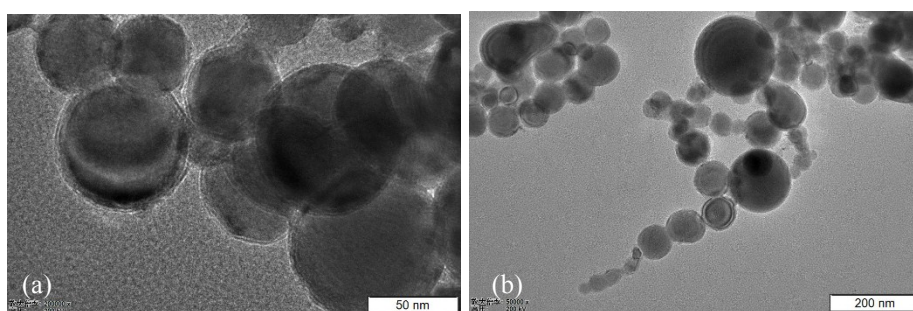

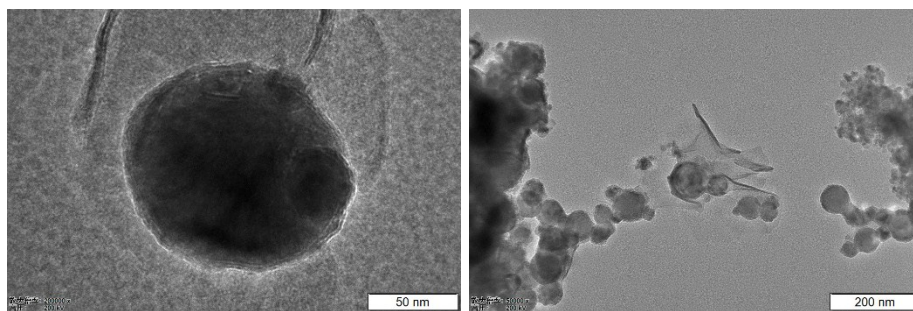

Fig. S3. TEM images of nZVI before (a-b) and after (c-d) reaction.

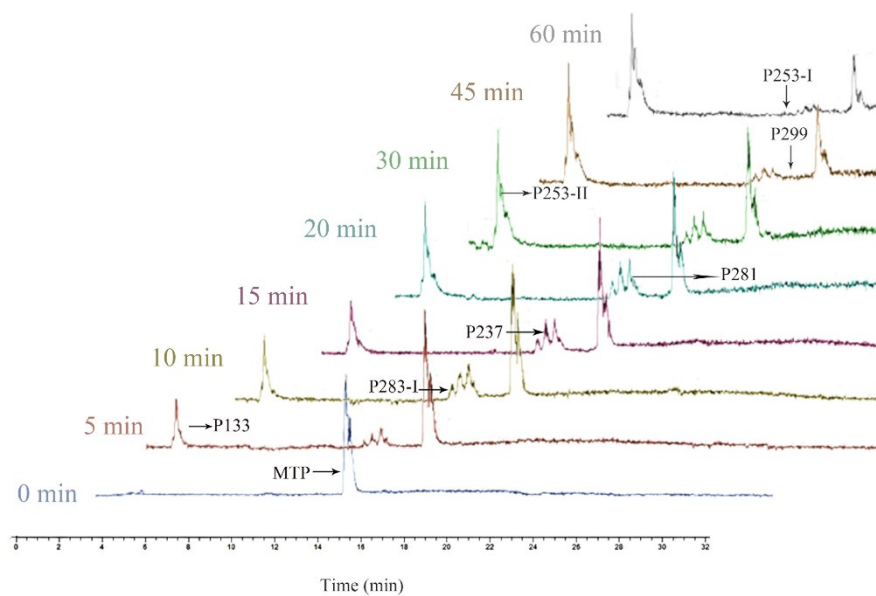

Fig. S4 Total ion current (TIC) chromatograms obtained under different reaction times.

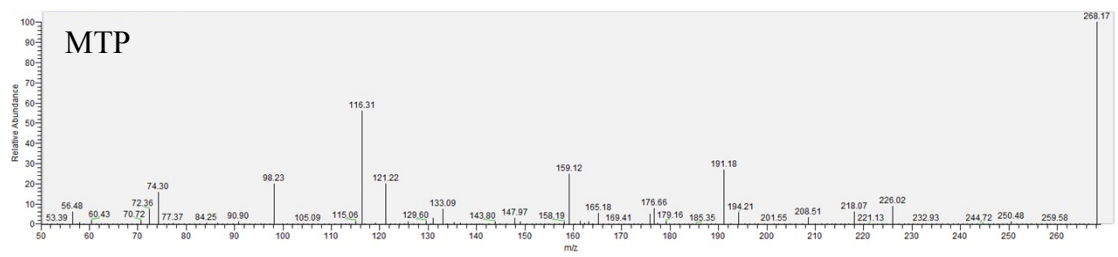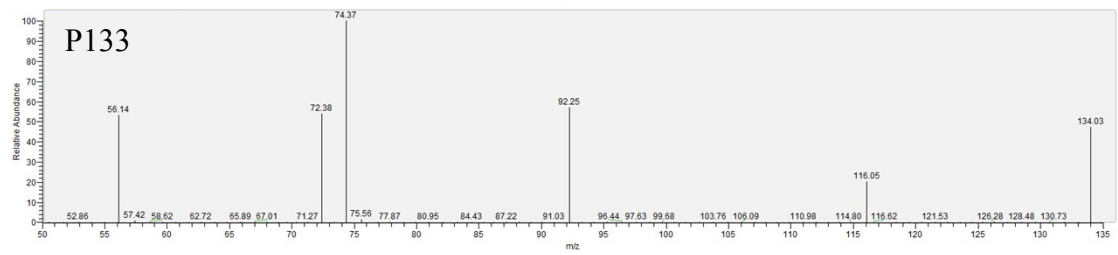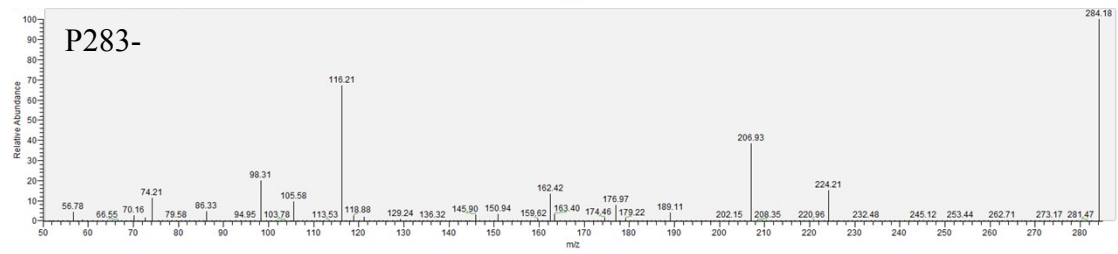

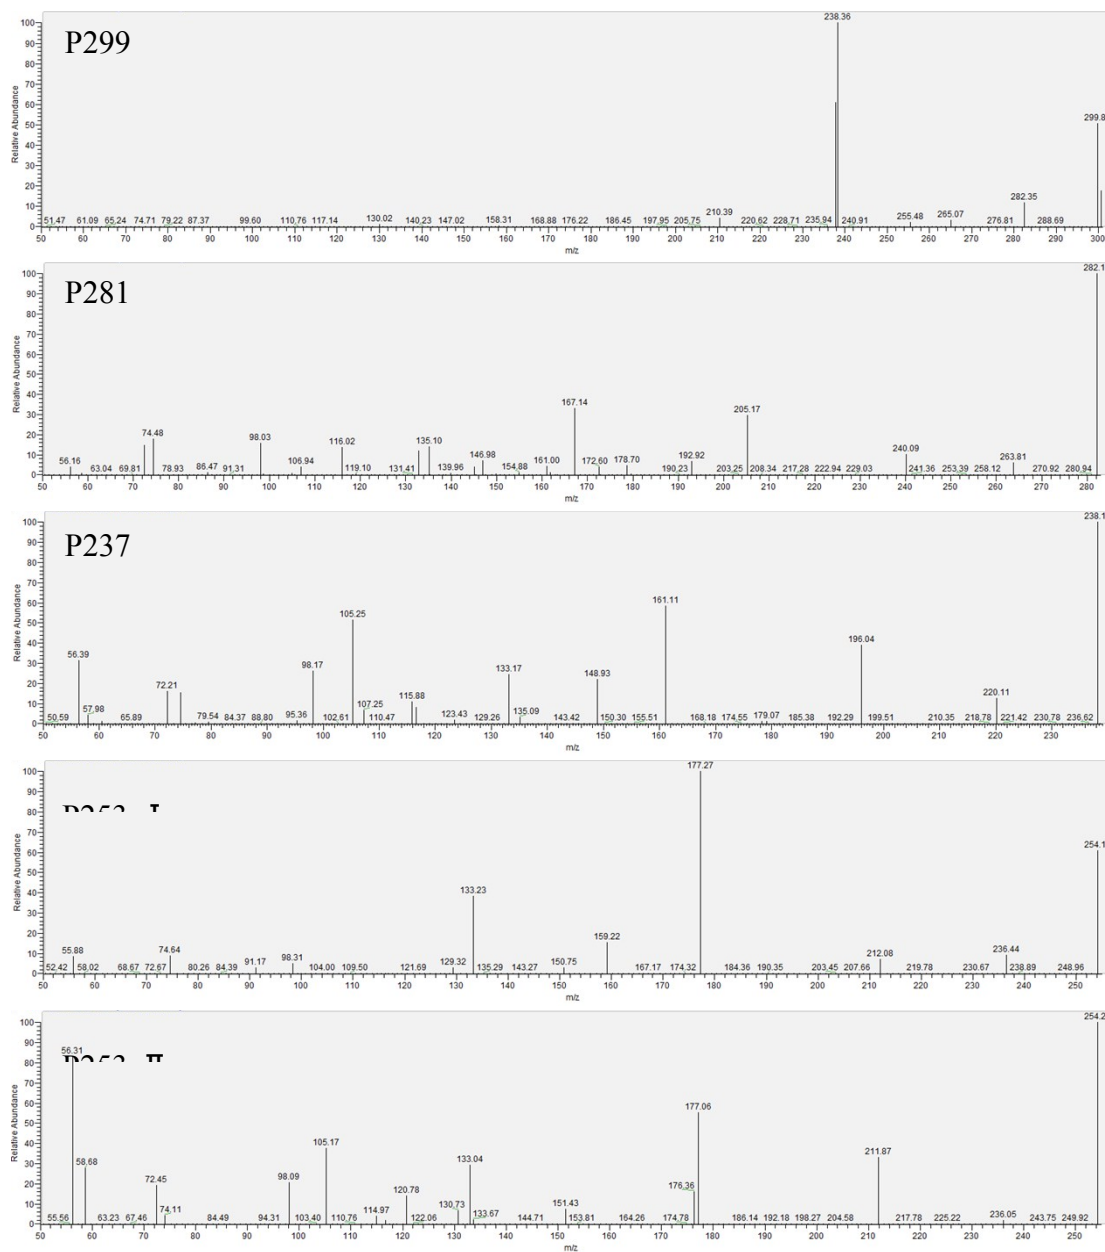

Fig. S5. MS/MS information for MTP and its intermediate products during the reaction.

Table S2. Intermediate products identified for MTP degradation.

| Compounds | Retention<br>time (min) | m/z | MS/MS                        | Structure                                                                             |
|-----------|-------------------------|-----|------------------------------|---------------------------------------------------------------------------------------|
| MTP       | 14.74                   | 268 | 56,74,98,116,133,159,191,226 | 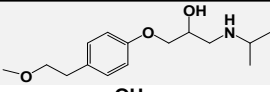 |
| P133      | 2.02                    | 134 | 56,74,92,116                 |  |
| P283- I   | 11.56                   | 284 | 56,74,98,116,177,207,224     |  |
| P299      | 12.44                   | 300 | 238,282                      |  |
| P281      | 12.39                   | 282 | 56,74,98,116,167,205,240,263 |  |



|                 |       |       |                                       |                                                                                     |
|-----------------|-------|-------|---------------------------------------|-------------------------------------------------------------------------------------|
| <b>P237</b>     | 11.97 | 238   | 56,72,98,105,133,161,196,220          | 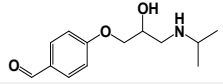 |
| <b>P253- I</b>  | 10.91 | 254-1 | 56,72,98,<br>116,133,159,,177,212,236 |  |
| <b>P253- II</b> | 1.85  | 254-2 | 56,72,98,105,121,133,151,177,<br>212  |  |

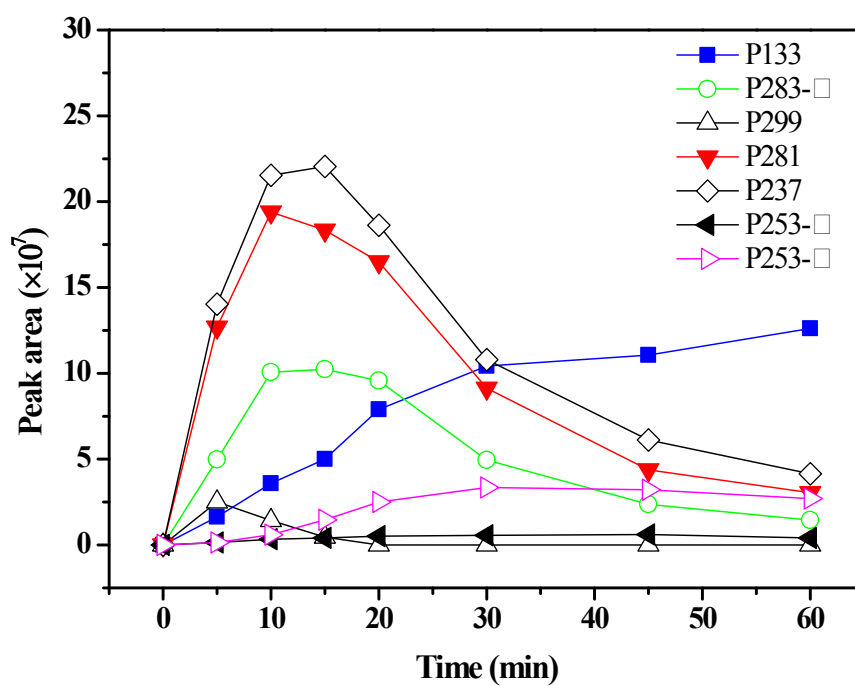

Fig. S6. The time evolution of the peak areas of the identified products.

Conditions:  $[\text{MTP}]_0 = 0.05 \text{ mM}$ ,  $[\text{PS}]_0 = 2 \text{ mM}$ ,  $[\text{nZVI}]_0 = 0.33 \text{ g/L}$ , no pH adjustment.
